# Supplementary material for: Efficient red emission from PMMA films doped with 5,6-DTFI europium(iii) complexes: synthesis, structure and photophysical properties
Source: Royal Society of Chemistry journal article supplement (doi:10.1039/c3dt50580d), 2013-01-01
Supplement: c3dt50580d.pdf [file c3dt50580d.pdf]

## Supporting Information

### Efficient red emission from PMMA films doped with 5,6-DTFI europium(III) complexes: synthesis, structure and photophysical properties

Weizuo Li, Pengfei Yan,\* Guangfeng Hou, Hongfeng Li and Guangming Li\*

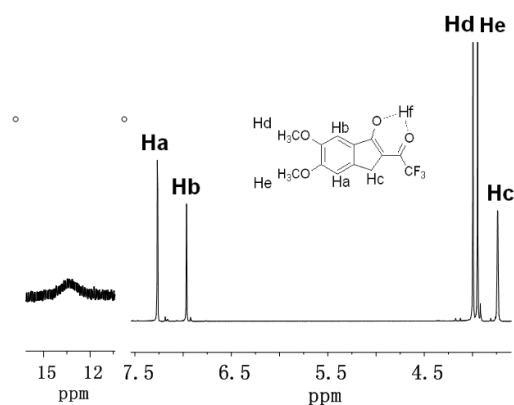

**Fig. S1** 400 MHz  $^1\text{H}$  NMR spectrum of 5,6-DTFI in  $\text{CDCl}_3$ .

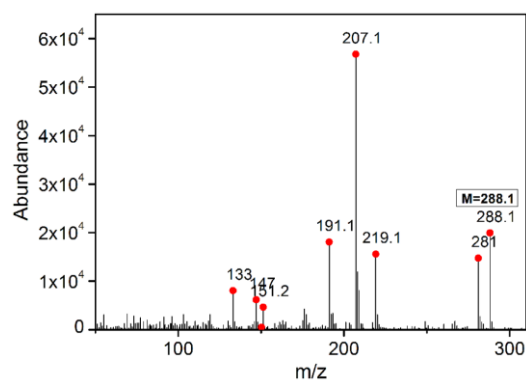

**Fig. S2** Expanded regions of the EI-MS of 5,6-DTFI in acetone.

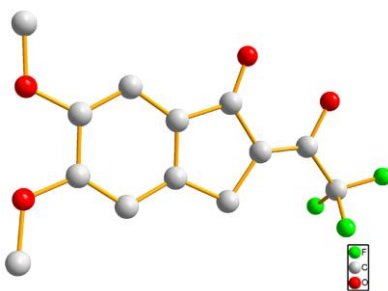

**Fig. S3** Molecular structure of 5,6-DTFI.

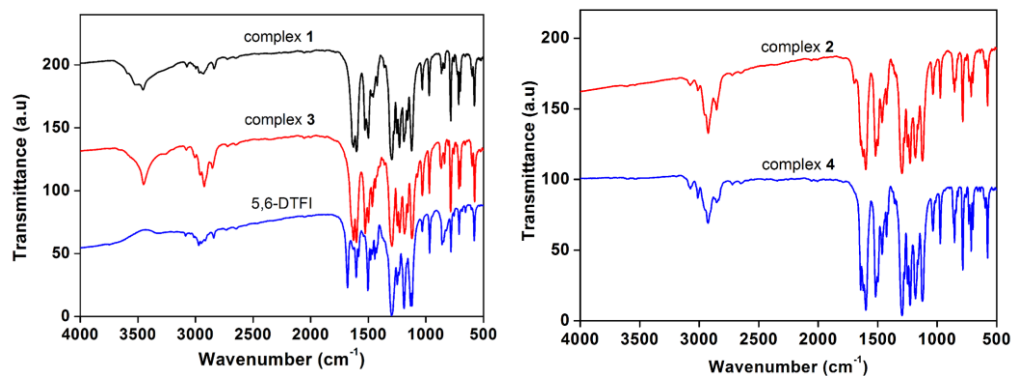

Fig. S4 IR spectra of 5,6-DTFI, complexes **1** and **3** (left); IR spectra of complexes **2** and **4** (right).

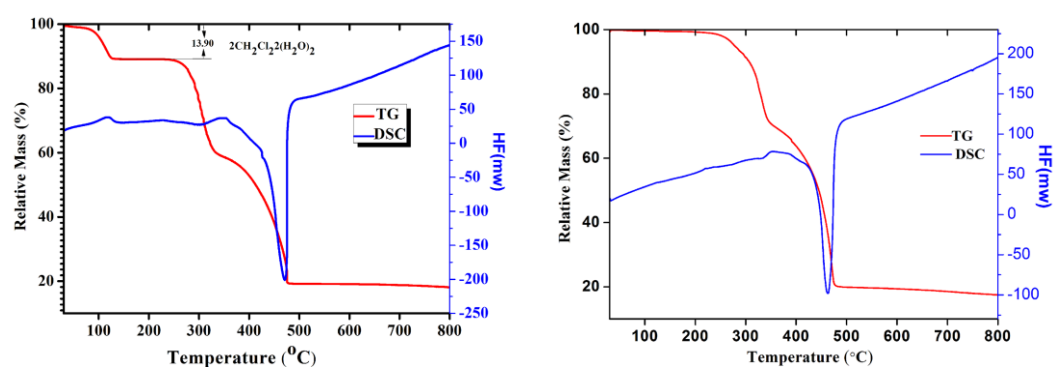

Fig. S5 TG-DSC curve for complexes **1**(left) and **2** (right).

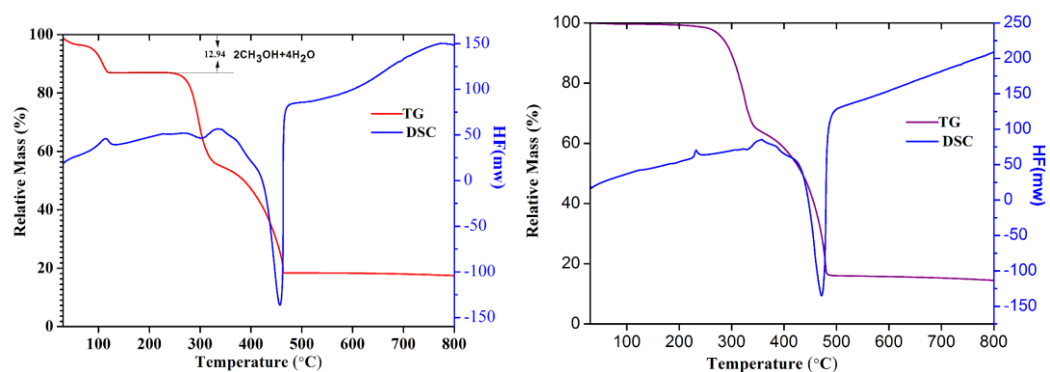

Fig. S6 TG-DSC curve for complexes **3** and **4**.

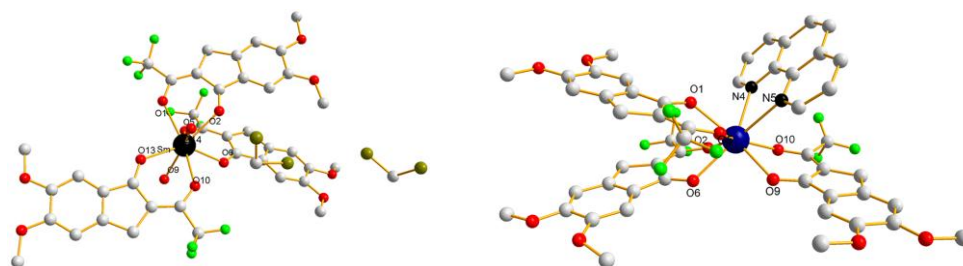

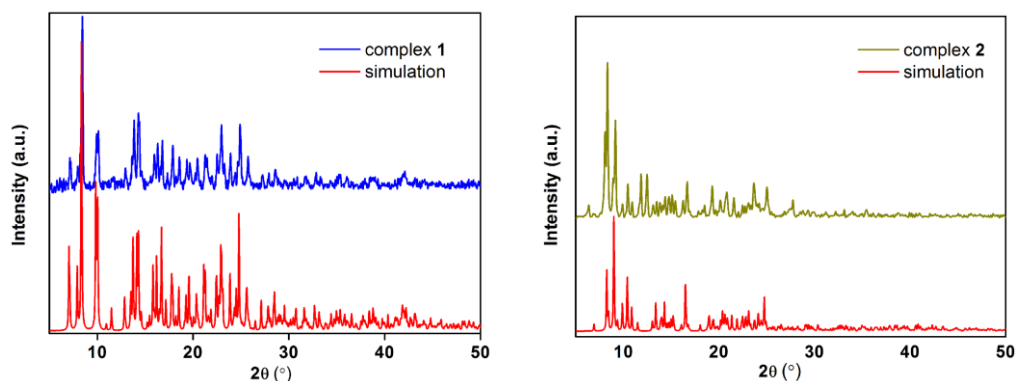

**Fig. S8** X-ray powder pattern of microcrystalline samples and simulated patterns of **1** and **2**.

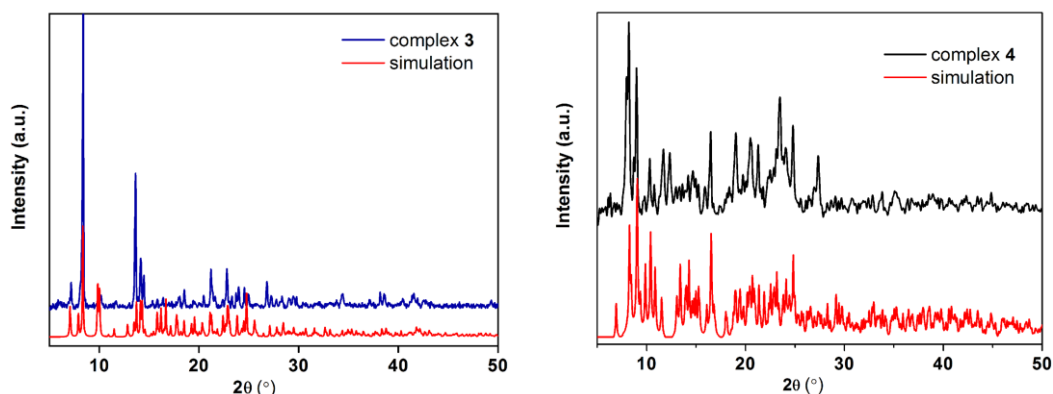

**Fig. S9** X-ray powder pattern of microcrystalline samples and simulated patterns of **3** and **4**.

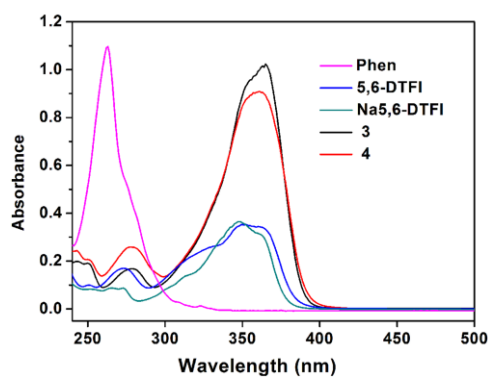

**Fig. S10** UV-vis absorption spectra of 5,6-DTFI, Na5,6-DTFI, Phen, complexes **3** and **4** in  $\text{CH}_3\text{CN}$  solution ( $c = 1 \times 10^{-5}$  M).

#### Solution-state luminescent properties of complexes 1–4

The excitation and emission spectra of **1** and **2** in  $\text{CH}_3\text{CN}$  solution ( $c = 1 \times 10^{-5}$  M) are shown in (Fig. S11 left). The excitation spectra of complexes **1** and **2** exhibit a broad band between 230 and 420 nm which is due to the  $\pi$ - $\pi^*$  transition of the coordinated ligand. This result indicates that the emission of the  $\text{Eu}^{3+}$  complexes are mainly sensitized by the absorption of the  $\beta$ -diketone ligand in the UV region rather than directly by the  $\text{Eu}^{3+}$  ion absorption. Upon excitation at 375 nm, complexes **1** and **2** showed the characteristic narrow emission bands of the  $\text{Eu}^{3+}$  ion corresponding to the  $^5\text{D}_0 \rightarrow ^7\text{F}_J$  ( $J = 0-4$ )

transitions. Among them, the  $^5D_0 \rightarrow ^7F_2$  transition at  $\lambda = 612$  nm is the strongest that is an induced electric dipole transition and its corresponding intensity is very sensitive to the coordination environment. This very intense  $^5D_0 \rightarrow ^7F_2$  peak, pointing to a highly polarizable chemical environment around the  $\text{Eu}^{3+}$  ion and is responsible for the brilliant red emission of complexes **1** and **2**.

The excitation and emission spectra of **3** and **4** in  $\text{CH}_3\text{CN}$  solution ( $c = 1 \times 10^{-5}$  M) are displayed in (Fig. S11 right) The excitation spectra of complexes **3** and **4** exhibit two bands between 230–350 nm and 380–430 nm, which are due to the  $\pi\text{-}\pi^*$  transition of the coordinated ligand. PL spectra of complexes **3** and **4** in  $\text{CH}_3\text{CN}$  shows typical narrow band emissions of  $\text{Sm}^{3+}$  ion corresponding to the  $^4G_{5/2} \rightarrow ^6H_J$  ( $J = 5/2, 7/2, 9/2, 11/2$ ) transitions. The three expected peaks for the  $^4G_{5/2} \rightarrow ^6H_{5/2-9/2}$  transitions are well resolved. The most intense peak is the hypersensitive transition  $^4G_{5/2} \rightarrow ^6H_{9/2}$  at 645 nm.

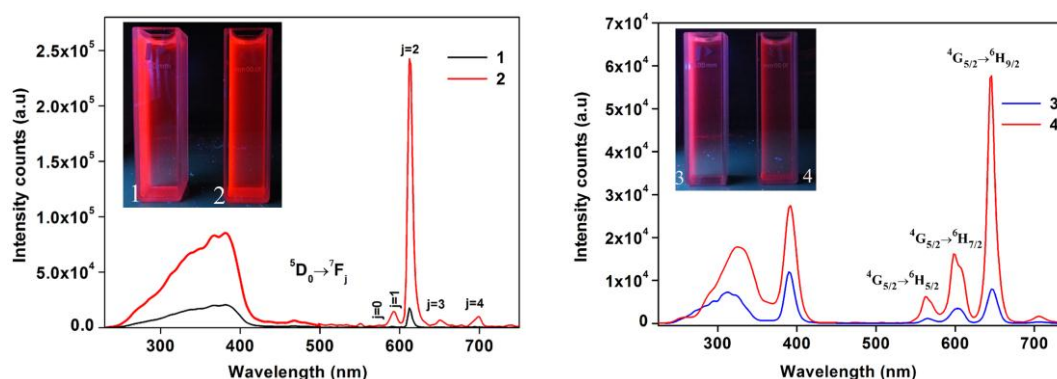

**Fig. S11** Room temperature (298K) excitation and emission spectra of complexes **1** and **2** in  $\text{CH}_3\text{CN}$  solution ( $c = 1 \times 10^{-5}$  M) (left); Room temperature (298K) excitation and emission spectra of complexes **3** and **4** in  $\text{CH}_3\text{CN}$  solution ( $c = 1 \times 10^{-5}$  M) (right).

The luminescence decays ( $\tau_{\text{obs}}$ ) are single exponential functions for complexes **1** and **2** at 298 K in acetonitrile solution ( $c = 1 \times 10^{-5}$  M) (Fig. S12 left)., The shorter lifetime observed for complex **1** ( $\tau_{\text{obs}} = 26.52 \mu\text{s}$ ) belongs to the dominant non-radiative decay channels associated with vibronic coupling induced by the presence of water molecules. On the other side, because of the disappeared of non-radiative decay pathways, longer lifetime values have been observed for complex **2** ( $\tau_{\text{obs}} = 219.33 \mu\text{s}$ ) due to the phen replace the water molecules of complex **1**.

The luminescent decay profiles of the  $^4G_{5/2} \rightarrow ^6H_{9/2}$  transition at 645 nm for complexes **3** and **4** in acetonitrile solution ( $c = 1 \times 10^{-5}$  M) at 298K (Fig. S12 right). The luminescent decay profiles for complexes **3** and **4** at 298K by fitting the data to a single-exponential decay curve. The relatively shorter lifetime observed for complex **3** ( $\tau_{\text{obs}} = 9.43 \mu\text{s}$ ) can be caused by dominant nonradiative decay channels associated with vibronic coupling because of the presence of water molecules, On the other hand, the relative longer lifetime have been observed for complex **4** ( $\tau_{\text{obs}} = 28.13 \mu\text{s}$ ) due to the less important nonradiative deactivation pathways.

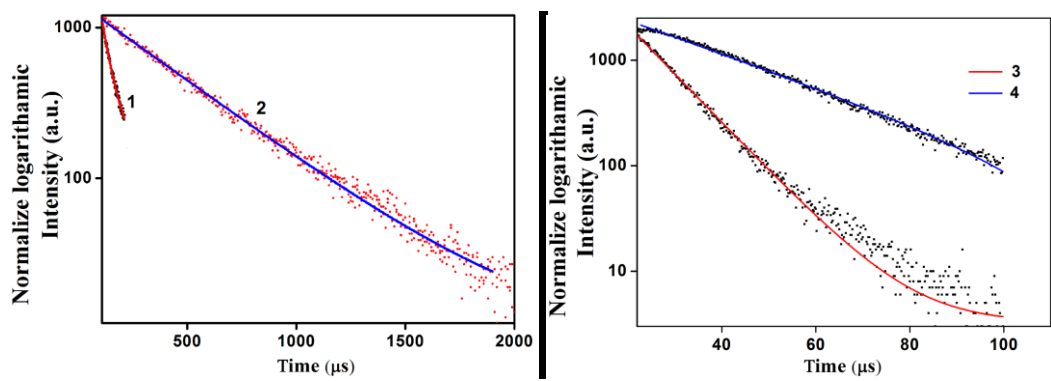

**Fig. S12** Luminescence decay profiles for complexes **1-2** (left) and **3-4** (right) in CH<sub>3</sub>CN solution ( $c = 1 \times 10^{-5}$  M) were measured at 298K.

**Table S1** Selected bond length (Å) and angles (°) for complexes **1-4**

| <b>1</b>          |            | <b>2</b>         |           | <b>3</b>          |            | <b>4</b>         |           |
|-------------------|------------|------------------|-----------|-------------------|------------|------------------|-----------|
| Eu(1)–O(1)        | 2.383(3)   | Eu(1)–O(1)       | 2.343(4)  | Sm(1)–O(1)        | 2.397(3)   | Sm(1)–O(1)       | 2.357(4)  |
| Eu(1)–O(2)        | 2.408(4)   | Eu(1)–O(2)       | 2.381(4)  | Sm(1)–O(2)        | 2.414(4)   | Sm(1)–O(2)       | 2.398(4)  |
| Eu(1)–O(5)        | 2.376(3)   | Eu(1)–O(5)       | 2.381(4)  | Sm(1)–O(5)        | 2.390(3)   | Sm(1)–O(5)       | 2.391(4)  |
| Eu(1)–O(6)        | 2.365(3)   | Eu(1)–O(6)       | 2.415(4)  | Sm(1)–O(6)        | 2.374(3)   | Sm(1)–O(6)       | 2.422(4)  |
| Eu(1)–O(9)        | 2.362(4)   | Eu(1)–O(9)       | 2.399(4)  | Sm(1)–O(9)        | 2.384(3)   | Sm(1)–O(9)       | 2.407(4)  |
| Eu(1)–O(10)       | 2.445(3)   | Eu(1)–O(10)      | 2.361(4)  | Sm(1)–O(10)       | 2.462(3)   | Sm(1)–O(10)      | 2.377(4)  |
| Eu(1)–O(13)       | 2.458(3)   | Eu(1)–N(4)       | 2.607(5)  | Sm(1)–O(13)       | 2.470(3)   | N(4)–Sm(1)       | 2.618(5)  |
| Eu(1)–O(14)       | 2.449(3)   | Eu(1)–N(5)       | 2.618(5)  | Sm(1)–O(14)       | 2.459(3)   | N(5)–Sm(1)       | 2.636(5)  |
| O(1)–Eu(1)–O(2)   | 72.24(11)  | O(1)–Eu(1)–O(2)  | 72.22(14) | O(1)–Sm(1)–O(2)   | 71.69(11)  | O(1)–Sm(1)–O(2)  | 71.84(13) |
| O(5)–Eu(1)–O(6)   | 73.51(12)  | O(5)–Eu(1)–O(6)  | 71.79(14) | O(5)–Sm(1)–O(6)   | 73.29(12)  | O(5)–Sm(1)–O(6)  | 71.77(13) |
| O(9)–Eu(1)–O(10)  | 73.63(11)  | O(9)–Eu(1)–O(10) | 72.36(14) | O(9)–Sm(1)–O(10)  | 73.26(11)  | O(9)–Sm(1)–O(10) | 72.07(13) |
| O(13)–Eu(1)–O(14) | 144.72(12) | N(4)–Eu(1)–N(5)  | 62.83(16) | O(13)–Sm(1)–O(14) | 145.05(11) | N(4)–Sm(1)–N(5)  | 62.57(15) |
